# Supplementary material for: IL-17–producing follicular Th cells enhance plasma cell differentiation in lupus-prone mice
Source: JCI journal article supplement (doi:10.1172/jci.insight.157332), 2022-06-07
Supplement: sd1 [file 1]

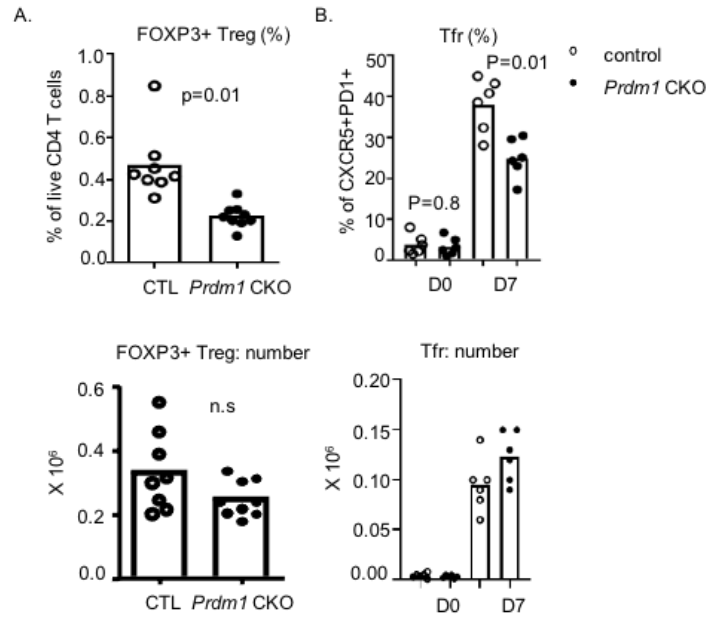

**Supplemental figure 1. Frequency and number of Treg and Tfr cells in *Prdm1* CKO mice.**

**(A)** 6-8 weeks old female FOXP3-GFP *Prdm1* CKO mice and gender/ age-matched littermate control mice were used to investigate FOXP3+ CD4+ Treg cells in the spleens. Percent and number of Treg cells were calculated and plotted. **(B)** To induce Tfr cells, 6-8 weeks old female FOXP3-GFP *Prdm1* CKO mice and gender and age-matched littermate control mice were immunized with NP-CGG (100 µg) in CFA i.p. Unimmunized group (D0) and immunized group (D7) of mice were sacrificed and Tfr cells were identified by flow cytometry analysis. Each dot represents an individual mouse, and the bar graph indicates mean (n=3).

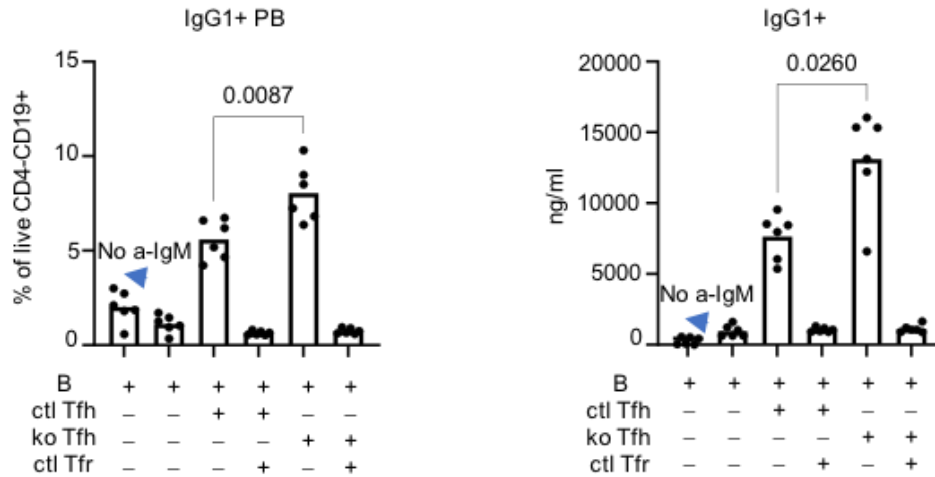

**Supplemental figure 2. Increased IgG1+ PB differentiation by Tfh cells from *Prdm1* CKO mice.** 6-8 weeks old female FOXP3-GFP; *Prdm1* CKO or FOXP3-GFP; control mice were immunized with NP-CGG s.c. and B cells (CD19+), Tfh (TCR $\beta$ +CD4+CXCR5+PD1+FOXP3-) and Tfr (TCR $\beta$ +CD4+CXCR5+PD1+FOXP3+) cells were isolated from draining lymph nodes by cell sorter. Isolated B cells were cultured alone, with Tfh or with Tfh and Tfr in the presence of anti-IgM+ anti-CD3 as indicated in the figure except the B alone with blue arrow (no anti-IgM or anti-CD3 was added). After 7 days of culture, PB was identified by staining of GL7, IgG1 and IgM and calculated **(A)**. **(B)** Secreted IgG1 in the supernatant was measured by ELISA. Each dot represents an individual mouse, and the bar represents the mean (n=3).

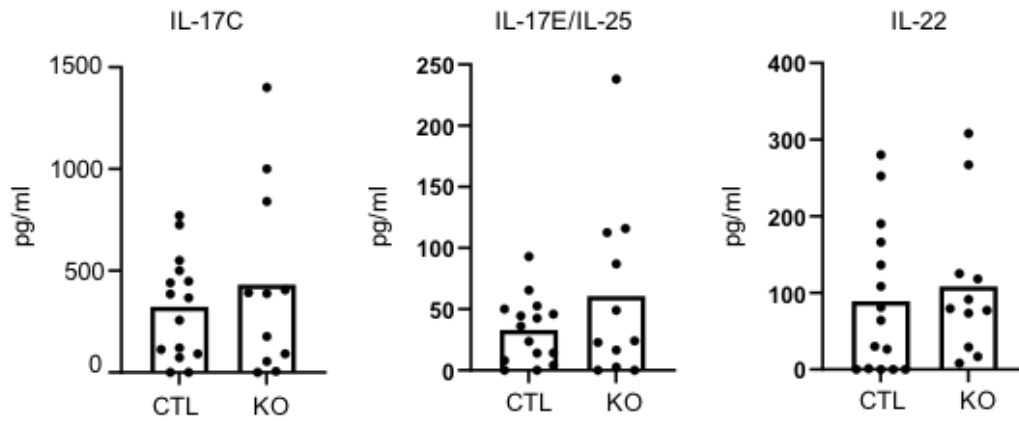

**Supplemental figure 3. IL-17 family cytokines secreted from Tfh cells.** Spleens were collected from day 7 post NP-immunized *Prdm1* CKO or littermate CTL mice. Tfh cells were isolated and cultured overnight. Next day, the supernatant was collected and measured by MSD. The bar represents the mean, and each dot represents an individual mouse (n=5).

**Supplemental table 1. Increased expression in Tfh of Prdm1 CKO mice compared to CTL mice.**

| <b>Gene</b>          | <b>baseMean</b> | <b>log2FC</b> | <b>lfcSE</b> | <b>stat</b> | <b>pvalue</b> | <b>padj</b> |
|----------------------|-----------------|---------------|--------------|-------------|---------------|-------------|
| <i>Ighv5-9-1</i>     | 115.758005      | 5.05964362    | 0.7882195    | 6.41907948  | 1.371E-10     | 2.0524E-06  |
| <i>Igkv5-48</i>      | 31.1802716      | 6.28135853    | 1.22329998   | 5.1347655   | 2.825E-07     | 0.00211448  |
| <i>Gm35028</i>       | 17.2944547      | 7.30166045    | 1.5344246    | 4.75856583  | 1.9497E-06    | 0.00972917  |
| <i>Ighv5-9</i>       | 38.6841584      | 8.46425119    | 1.81052278   | 4.67503159  | 2.9391E-06    | 0.01050597  |
| <i>Igkv1-122</i>     | 15.5135705      | 7.14806754    | 1.54521361   | 4.62594137  | 3.729E-06     | 0.01050597  |
| <i>Ighv1-50</i>      | 19.2635452      | 7.46457817    | 1.62248878   | 4.60069632  | 4.2108E-06    | 0.01050597  |
| <i>Ighv7-1</i>       | 403.119884      | 1.74536412    | 0.41308999   | 4.22514265  | 2.3879E-05    | 0.05106683  |
| <i>Ighv1-58</i>      | 42.8386354      | 7.61053888    | 1.85143341   | 4.11061983  | 3.946E-05     | 0.07383923  |
| <i>Hpse</i>          | 416.852034      | 0.85180787    | 0.21636537   | 3.9368956   | 8.2542E-05    | 0.09560757  |
| <i>Ighv2-9-1</i>     | 13.2748078      | 6.92661365    | 1.76003691   | 3.9354934   | 8.3026E-05    | 0.09560757  |
| <i>Fgfbp3</i>        | 9.30270864      | 6.40663165    | 1.75290563   | 3.65486399  | 0.00025732    | 0.20597341  |
| <i>Igkv12-41</i>     | 43.3441099      | 6.48747473    | 1.79914505   | 3.60586531  | 0.00031111    | 0.22178018  |
| <i>Fem1c</i>         | 621.096862      | 0.67300462    | 0.1886287    | 3.56788023  | 0.00035988    | 0.24488261  |
| <i>Iglc1</i>         | 950.444704      | 1.63597395    | 0.46791961   | 3.49627139  | 0.00047181    | 0.30708584  |
| <i>4930452B06Rik</i> | 14.8607292      | 4.1798241     | 1.28155958   | 3.26151367  | 0.00110819    | 0.47391982  |
| <i>Hace1</i>         | 268.673208      | 1.11046392    | 0.34053897   | 3.26090114  | 0.00111059    | 0.47391982  |
| <i>Bub1b</i>         | 934.463895      | 0.74642355    | 0.22909257   | 3.25817446  | 0.00112131    | 0.47391982  |
| <i>Stbd1</i>         | 18.0200486      | 4.25815237    | 1.31132691   | 3.24720886  | 0.00116543    | 0.47391982  |
| <i>Iglv1</i>         | 1159.43301      | 1.57104796    | 0.48585903   | 3.23354687  | 0.00122263    | 0.47391982  |
| <i>Snx18</i>         | 215.112881      | 0.90511847    | 0.28120874   | 3.21867123  | 0.00128786    | 0.47391982  |
| <i>Col24a1</i>       | 7.04318563      | 6.01202903    | 1.9059871    | 3.15428632  | 0.00160891    | 0.5207021   |

|                  |            |            |            |            |            |            |
|------------------|------------|------------|------------|------------|------------|------------|
| <i>Cdk16</i>     | 467.852867 | 1.04983606 | 0.33492293 | 3.13456014 | 0.00172112 | 0.52581962 |
| <i>Adam12</i>    | 6.94341166 | 5.98327377 | 1.9485796  | 3.07058216 | 0.00213642 | 0.59226281 |
| <i>Igkv4-80</i>  | 14.5410609 | 7.05227447 | 2.30865564 | 3.05471044 | 0.00225278 | 0.5935101  |
| <i>Neil2</i>     | 6.69484445 | 5.93696788 | 1.95121093 | 3.04270942 | 0.00234459 | 0.5935101  |
| <i>Igkv3-2</i>   | 49.0763616 | 4.32226868 | 1.42156303 | 3.04050443 | 0.00236182 | 0.5935101  |
| <i>Cep131</i>    | 42.8916214 | 2.18725563 | 0.72977364 | 2.99716995 | 0.00272499 | 0.62758558 |
| <i>Il17re</i>    | 13.1467253 | 4.77024533 | 1.59642683 | 2.9880764  | 0.00280739 | 0.62908205 |
| <i>Gm10382</i>   | 23.4335887 | 2.13176734 | 0.72253524 | 2.95039912 | 0.00317364 | 0.68601506 |
| <i>Isg20l2</i>   | 403.113017 | 0.70012452 | 0.23852288 | 2.93525098 | 0.00333278 | 0.69644044 |
| <i>Hbb-bs</i>    | 144.751611 | 1.86589952 | 0.63602533 | 2.93368744 | 0.00334961 | 0.69644044 |
| <i>Slc30a5</i>   | 548.631923 | 0.92615417 | 0.32383924 | 2.85991953 | 0.00423749 | 0.82383315 |
| <i>Rcbtb1</i>    | 709.85942  | 0.68006515 | 0.2399054  | 2.83472211 | 0.00458656 | 0.88026599 |
| <i>Ighv1-19</i>  | 42.2040267 | 3.37154751 | 1.20592944 | 2.79580827 | 0.00517701 | 0.93763336 |
| <i>Ube2l6</i>    | 441.784416 | 0.625549   | 0.22530469 | 2.77645797 | 0.00549547 | 0.93763336 |
| <i>Msl2</i>      | 372.78232  | 0.65703013 | 0.23668744 | 2.77594006 | 0.00550424 | 0.93763336 |
| <i>Igkv9-129</i> | 9.55917563 | 6.44174704 | 2.32100922 | 2.77540778 | 0.00551325 | 0.93763336 |
| <i>Il23r</i>     | 7.12371747 | 5.04952772 | 1.82647132 | 2.76463564 | 0.00569864 | 0.93763336 |
| <i>Ighv2-7</i>   | 11.739064  | 6.74689776 | 2.44342131 | 2.76125028 | 0.00575805 | 0.93763336 |
| <i>Timm29</i>    | 545.723275 | 1.15199913 | 0.41777328 | 2.75747444 | 0.00582498 | 0.93763336 |
| <i>Ighv14-2</i>  | 28.7867807 | 3.99944957 | 1.46090767 | 2.73764705 | 0.00618804 | 0.93841299 |
| <i>Dnph1</i>     | 160.202193 | 0.98242732 | 0.3594173  | 2.73338905 | 0.00626862 | 0.93841299 |
| <i>Trim62</i>    | 35.637321  | 1.59722168 | 0.58576522 | 2.72672671 | 0.0063966  | 0.94241503 |
| <i>Lmo1</i>      | 9.95426607 | 4.35599128 | 1.60190393 | 2.71925876 | 0.00654284 | 0.95093513 |
| <i>Cd5l</i>      | 214.766826 | 0.91614302 | 0.34101333 | 2.68653141 | 0.00721982 | 0.99622089 |

|                      |            |            |            |            |            |            |
|----------------------|------------|------------|------------|------------|------------|------------|
| <i>Cd109</i>         | 24.0937774 | 3.39263399 | 1.26926208 | 2.6729184  | 0.00751945 | 0.99704377 |
| <i>Sirpa</i>         | 2001.55681 | 0.90870081 | 0.34120267 | 2.6632289  | 0.00773947 | 0.99704377 |
| <i>Gramd1a</i>       | 2934.17401 | 0.42663084 | 0.16027426 | 2.66187994 | 0.00777056 | 0.99704377 |
| <i>Pif1</i>          | 262.073531 | 0.9102622  | 0.34230092 | 2.65924556 | 0.00783159 | 0.99704377 |
| <i>Ighv1-15</i>      | 47.546926  | 4.07535745 | 1.54143602 | 2.64387065 | 0.0081964  | 0.99840724 |
| <i>Sass6</i>         | 131.183055 | 1.03913122 | 0.39487515 | 2.63154375 | 0.00849979 | 0.99840724 |
| <i>Fam105a</i>       | 2534.60298 | 0.67042297 | 0.25492123 | 2.62992205 | 0.00854044 | 0.99840724 |
| <i>Gns</i>           | 797.181134 | 0.61008363 | 0.23228385 | 2.62645736 | 0.00862788 | 0.99840724 |
| <i>Igkv1-88</i>      | 6.94410409 | 5.979015   | 2.28504831 | 2.61658144 | 0.00888152 | 0.99840724 |
| <i>Igkv12-98</i>     | 9.87187214 | 6.49160951 | 2.48395146 | 2.61342044 | 0.0089641  | 0.99840724 |
| <i>1700067K01Rik</i> | 5.82088422 | 5.72623121 | 2.19471916 | 2.60909519 | 0.0090782  | 0.99840724 |
| <i>C1qc</i>          | 304.553293 | 1.4758551  | 0.56821677 | 2.5973452  | 0.00939475 | 0.99840724 |
| <i>Pls3</i>          | 28.8167884 | 2.31166559 | 0.9053465  | 2.55334901 | 0.01066925 | 0.99840724 |
| <i>Ubqln1</i>        | 717.552015 | 0.67981081 | 0.26758131 | 2.54057663 | 0.01106698 | 0.99840724 |
| <i>Slc26a2</i>       | 818.670112 | 0.41576057 | 0.163794   | 2.53831387 | 0.0111388  | 0.99840724 |
| <i>Uhrf1</i>         | 1238.97269 | 0.40244998 | 0.15942303 | 2.52441554 | 0.01158908 | 0.99840724 |
| <i>Gm4673</i>        | 21.2128369 | 2.26723342 | 0.8998692  | 2.51951441 | 0.01175168 | 0.99840724 |
| <i>Cenpn</i>         | 178.944402 | 0.87533074 | 0.34788732 | 2.51613292 | 0.01186504 | 0.99840724 |
| <i>Igkv6-13</i>      | 5.47853485 | 5.65289617 | 2.2607307  | 2.50047304 | 0.01240276 | 0.99840724 |
| <i>Bex3</i>          | 477.126397 | 0.54627267 | 0.21878395 | 2.49685898 | 0.01252988 | 0.99840724 |
| <i>Zfp622</i>        | 201.13735  | 1.15893476 | 0.46428567 | 2.49616742 | 0.01255433 | 0.99840724 |
| <i>Gm10655</i>       | 7.51630682 | 4.46432982 | 1.79972051 | 2.4805684  | 0.01311731 | 0.99840724 |
| <i>Iglv2</i>         | 761.261574 | 0.80156667 | 0.32420493 | 2.47240746 | 0.01342065 | 0.99840724 |
| <i>Olr1</i>          | 16.1889427 | 2.90268294 | 1.17576646 | 2.46875807 | 0.01355829 | 0.99840724 |

|                      |            |            |            |            |            |            |
|----------------------|------------|------------|------------|------------|------------|------------|
| <i>Abcb10</i>        | 58.4332462 | 1.24107849 | 0.50629378 | 2.4513011  | 0.01423408 | 0.99840724 |
| <i>Spi1</i>          | 1402.58112 | 0.97334842 | 0.39714557 | 2.45086061 | 0.01425151 | 0.99840724 |
| <i>Ccnb1</i>         | 679.984307 | 0.59352131 | 0.24492047 | 2.42332256 | 0.01537926 | 0.99840724 |
| <i>Iglc2</i>         | 1011.7235  | 0.91460274 | 0.37849715 | 2.4164059  | 0.01567458 | 0.99840724 |
| <i>Iglc3</i>         | 388.460495 | 1.39841705 | 0.58228438 | 2.40160495 | 0.01632333 | 0.99840724 |
| <i>Rxrb</i>          | 259.021076 | 0.59948775 | 0.2497494  | 2.40035715 | 0.01637908 | 0.99840724 |
| <i>Slc9a3r2</i>      | 8.60680537 | 3.74526048 | 1.56328531 | 2.39576259 | 0.01658583 | 0.99840724 |
| <i>Zfyve9</i>        | 137.457905 | 0.71869258 | 0.30032598 | 2.39304167 | 0.01670934 | 0.99840724 |
| <i>Ighd</i>          | 215.618784 | 0.86194283 | 0.36101778 | 2.3875357  | 0.01696176 | 0.99840724 |
| <i>Ly6icdkll23</i>   | 276.0454   | 1.03068777 | 0.43171499 | 2.38742643 | 0.0169668  | 0.99840724 |
| <i>Asf1b</i>         | 901.158175 | 0.37745533 | 0.15876183 | 2.37749428 | 0.01743071 | 0.99840724 |
| <i>Khl14</i>         | 4.59859184 | 5.39855985 | 2.28388075 | 2.36376608 | 0.01809023 | 0.99840724 |
| <i>Dnajb2</i>        | 142.752032 | 0.66044715 | 0.2795012  | 2.36294926 | 0.01813015 | 0.99840724 |
| <i>Igkv6-14</i>      | 8.59672358 | 6.29040461 | 2.6764625  | 2.35026817 | 0.01875989 | 0.99840724 |
| <i>Csgalnact2</i>    | 259.757089 | 1.17063523 | 0.49822558 | 2.34960887 | 0.01879315 | 0.99840724 |
| <i>Khdc3</i>         | 8.63749607 | 4.17857836 | 1.7998523  | 2.32162292 | 0.02025325 | 0.99840724 |
| <i>Gm16124</i>       | 27.9312404 | 1.77197398 | 0.76378008 | 2.32000549 | 0.02034058 | 0.99840724 |
| <i>Zfp318</i>        | 73.4419718 | 1.3103986  | 0.5650822  | 2.31895219 | 0.02039763 | 0.99840724 |
| <i>Oxsr1</i>         | 271.861136 | 0.72551405 | 0.31326338 | 2.31598747 | 0.02055895 | 0.99840724 |
| <i>Ptafr</i>         | 298.52026  | 1.17195143 | 0.50847039 | 2.30485678 | 0.0211746  | 0.99840724 |
| <i>4930579K19Rik</i> | 8.14316684 | 3.66583902 | 1.59251736 | 2.30191463 | 0.02133999 | 0.99840724 |
| <i>Gtf2h4</i>        | 347.643044 | 0.72599881 | 0.31546786 | 2.30133998 | 0.02137242 | 0.99840724 |
| <i>Pgp</i>           | 322.351234 | 0.69510739 | 0.30214123 | 2.30060426 | 0.02141401 | 0.99840724 |
| <i>Pacsin2</i>       | 783.969578 | 0.53673876 | 0.23346127 | 2.29904839 | 0.02150219 | 0.99840724 |

|                 |            |            |            |            |            |            |
|-----------------|------------|------------|------------|------------|------------|------------|
| <i>Jchain</i>   | 4779.01869 | 0.6000044  | 0.26185118 | 2.29139463 | 0.0219406  | 0.99840724 |
| <i>BC037032</i> | 24.1921289 | 1.64461338 | 0.72084762 | 2.28149937 | 0.02251891 | 0.99840724 |
| <i>Ccdc117</i>  | 396.988297 | 0.6508291  | 0.28545882 | 2.27994043 | 0.02261122 | 0.99840724 |
| <i>Acsl3</i>    | 62.6690585 | 1.174448   | 0.51604554 | 2.27586115 | 0.02285432 | 0.99840724 |
| <i>Ighv3-8</i>  | 11.9645062 | 3.46879706 | 1.52975296 | 2.26755376 | 0.02335642 | 0.99840724 |
| <i>Rhbdf1</i>   | 9.6699625  | 3.00997089 | 1.32842797 | 2.26581415 | 0.02346276 | 0.99840724 |
| <i>Tmco6</i>    | 308.724628 | 0.67998465 | 0.30189107 | 2.25241727 | 0.02429592 | 0.99840724 |
| <i>Asic1</i>    | 8.10926985 | 3.66689109 | 1.63021907 | 2.24932412 | 0.02449188 | 0.99840724 |
| <i>Gm4798</i>   | 6.13393905 | 4.17136515 | 1.85601571 | 2.24748375 | 0.02460913 | 0.99840724 |
| <i>Mark4</i>    | 90.9806007 | 1.09842703 | 0.48885534 | 2.24693676 | 0.02464407 | 0.99840724 |
| <i>Rab30</i>    | 18.4780576 | 2.41054811 | 1.07288869 | 2.24678303 | 0.0246539  | 0.99840724 |
| <i>Uqcr11</i>   | 513.158441 | 0.56540996 | 0.2527246  | 2.23725731 | 0.02526953 | 0.99840724 |
| <i>Gm11674</i>  | 4.88767781 | 5.47078701 | 2.44547302 | 2.2371079  | 0.02527929 | 0.99840724 |
| <i>Igkv3-7</i>  | 21.5402372 | 3.30814892 | 1.4821369  | 2.23201306 | 0.0256141  | 0.99840724 |
| <i>Igkv4-57</i> | 32.0169405 | 2.46433127 | 1.10576289 | 2.22862542 | 0.02583884 | 0.99840724 |
| <i>Xxylt1</i>   | 99.1291112 | 1.12058066 | 0.50306548 | 2.22750456 | 0.02591357 | 0.99840724 |
| <i>Cenpi</i>    | 203.053088 | 0.61018133 | 0.27435039 | 2.22409498 | 0.02614205 | 0.99840724 |
| <i>Tob1</i>     | 198.333556 | 0.68448056 | 0.30789968 | 2.22306353 | 0.02621152 | 0.99840724 |
| <i>Ighv1-53</i> | 54.8159648 | 1.44731648 | 0.65507929 | 2.20937602 | 0.0271485  | 0.99840724 |
| <i>Hectd3</i>   | 770.61753  | 0.50806454 | 0.23145754 | 2.19506579 | 0.02815888 | 0.99840724 |
| <i>Tusc2</i>    | 346.782066 | 0.84759279 | 0.38703617 | 2.18995757 | 0.02852731 | 0.99840724 |
| <i>Sod2</i>     | 1043.06487 | 0.41535983 | 0.18984193 | 2.18792461 | 0.02867509 | 0.99840724 |
| <i>Il13ra1</i>  | 510.735346 | 0.70061117 | 0.320571   | 2.18551015 | 0.02885146 | 0.99840724 |
| <i>Sqle</i>     | 400.303623 | 0.63722476 | 0.29160064 | 2.18526534 | 0.0288694  | 0.99840724 |

|                      |            |            |            |            |            |            |
|----------------------|------------|------------|------------|------------|------------|------------|
| <i>Atp13a2</i>       | 794.668218 | 0.57706128 | 0.26450314 | 2.1816803  | 0.02913314 | 0.99840724 |
| <i>Ngp</i>           | 239.560588 | 1.09405741 | 0.50191109 | 2.17978329 | 0.02927353 | 0.99840724 |
| <i>Iglj1</i>         | 80.8974019 | 1.25002606 | 0.57500194 | 2.17395104 | 0.02970881 | 0.99840724 |
| <i>Siglecg</i>       | 185.612166 | 0.78868726 | 0.36344733 | 2.17001805 | 0.03000548 | 0.99840724 |
| <i>Gch1</i>          | 266.691286 | 0.98429858 | 0.45510234 | 2.1628071  | 0.03055602 | 0.99840724 |
| <i>Ankrd29</i>       | 25.3839643 | 1.76578688 | 0.82062154 | 2.15176765 | 0.03141566 | 0.99840724 |
| <i>Cyp2d22</i>       | 29.0534434 | 1.58001033 | 0.73537457 | 2.14857898 | 0.03166779 | 0.99840724 |
| <i>Gm31024</i>       | 28.7899092 | 1.33704748 | 0.62294721 | 2.14632552 | 0.03184702 | 0.99840724 |
| <i>5830416l19Rik</i> | 47.6477454 | 1.2495466  | 0.58255067 | 2.1449578  | 0.03195622 | 0.99840724 |
| <i>Tmem177</i>       | 172.431342 | 0.72286647 | 0.33706306 | 2.14460305 | 0.0319846  | 0.99840724 |
| <i>Arhgap39</i>      | 189.9317   | 0.64607865 | 0.30142622 | 2.14340558 | 0.03208055 | 0.99840724 |
| <i>Wscd1</i>         | 4.43177877 | 5.33916135 | 2.49936349 | 2.13620843 | 0.03266243 | 0.99840724 |
| <i>Thap11</i>        | 457.563662 | 0.82780343 | 0.38762722 | 2.13556578 | 0.03271482 | 0.99840724 |
| <i>Prim2</i>         | 432.174206 | 0.49078297 | 0.22997907 | 2.13403319 | 0.03284006 | 0.99840724 |
| <i>Igkv14-130</i>    | 11.3694214 | 6.69598472 | 3.13788488 | 2.13391663 | 0.03284961 | 0.99840724 |
| <i>Ighv1-31</i>      | 11.3694214 | 6.69598472 | 3.13788488 | 2.13391663 | 0.03284961 | 0.99840724 |
| <i>Gas2l3</i>        | 113.007969 | 0.96859157 | 0.45465058 | 2.13040873 | 0.03313788 | 0.99840724 |
| <i>Rps4l</i>         | 32.9783915 | 2.48372444 | 1.16597018 | 2.13017835 | 0.03315689 | 0.99840724 |
| <i>Wfs1</i>          | 90.1513817 | 0.91454242 | 0.42962948 | 2.12867709 | 0.03328099 | 0.99840724 |
| <i>Pcdhga5</i>       | 5.84996507 | 4.10338542 | 1.93056225 | 2.12548724 | 0.03354598 | 0.99840724 |
| <i>Ighg2b</i>        | 52.9495229 | 2.75255469 | 1.29603923 | 2.1238205  | 0.03368516 | 0.99840724 |
| <i>Ndfip2</i>        | 413.388578 | 0.55980345 | 0.26408637 | 2.11977412 | 0.0340251  | 0.99840724 |
| <i>Hba-a1</i>        | 48.9209582 | 1.28962948 | 0.6087473  | 2.11849725 | 0.03413298 | 0.99840724 |
| <i>5031434O11Rik</i> | 30.0714409 | 1.83980056 | 0.87137343 | 2.11138015 | 0.03473965 | 0.99840724 |

|                      |            |            |            |            |            |            |
|----------------------|------------|------------|------------|------------|------------|------------|
| <i>Ighv9-1</i>       | 7.33653089 | 6.06838679 | 2.87567412 | 2.11024843 | 0.03483696 | 0.99840724 |
| <i>IgIj3</i>         | 40.9515212 | 1.73605808 | 0.82370106 | 2.10763123 | 0.0350629  | 0.99840724 |
| <i>Mcur1</i>         | 521.944156 | 0.78279843 | 0.37290331 | 2.09919947 | 0.03579932 | 0.99840724 |
| <i>Ddx3x</i>         | 1946.20215 | 0.37718942 | 0.1798496  | 2.09724909 | 0.03597153 | 0.99840724 |
| <i>B3galt6</i>       | 208.065103 | 0.65331219 | 0.31160924 | 2.09657515 | 0.0360312  | 0.99840724 |
| <i>Slc30a9</i>       | 480.383583 | 0.66003166 | 0.31481476 | 2.09657153 | 0.03603152 | 0.99840724 |
| <i>Derl3</i>         | 80.7332274 | 1.11412201 | 0.53147706 | 2.09627487 | 0.03605781 | 0.99840724 |
| <i>Inpp1</i>         | 107.760983 | 1.01182072 | 0.48339086 | 2.09317303 | 0.03633371 | 0.99840724 |
| <i>Ccr12</i>         | 182.723012 | 0.57835248 | 0.2770039  | 2.08788567 | 0.03680815 | 0.99840724 |
| <i>Ttc12</i>         | 7.50241976 | 3.55565884 | 1.70548229 | 2.08484067 | 0.03708377 | 0.99840724 |
| <i>Mycbp</i>         | 121.869869 | 0.87951484 | 0.42189499 | 2.08467712 | 0.03709862 | 0.99840724 |
| <i>Cd300lf</i>       | 172.444852 | 0.89094967 | 0.42750721 | 2.08405764 | 0.03715492 | 0.99840724 |
| <i>Dscc1</i>         | 112.266881 | 0.7232688  | 0.34747575 | 2.08149436 | 0.03738868 | 0.99840724 |
| <i>Bex6</i>          | 28.499711  | 1.83412794 | 0.88194896 | 2.07963048 | 0.03755944 | 0.99840724 |
| <i>Nphp1</i>         | 17.0900367 | 2.50986668 | 1.21446351 | 2.06664643 | 0.03876748 | 0.99840724 |
| <i>Epha4</i>         | 20.6175206 | 2.44453547 | 1.18304237 | 2.06631269 | 0.03879896 | 0.99840724 |
| <i>Wdr36</i>         | 857.697595 | 0.55730536 | 0.26982967 | 2.0653969  | 0.03888546 | 0.99840724 |
| <i>Fbrs1</i>         | 196.892591 | 0.85658333 | 0.41586001 | 2.05978766 | 0.03941884 | 0.99840724 |
| <i>Ighd1-1</i>       | 29.2147127 | 1.51149631 | 0.7344826  | 2.05790622 | 0.03959914 | 0.99840724 |
| <i>E330021D16Rik</i> | 5.23004074 | 3.94781123 | 1.9184458  | 2.05781745 | 0.03960766 | 0.99840724 |
| <i>Gm30238</i>       | 3.68445147 | 5.07628378 | 2.46966835 | 2.0554516  | 0.03983541 | 0.99840724 |
| <i>Phldb1</i>        | 33.5457992 | 1.26625573 | 0.61994306 | 2.04253555 | 0.04109844 | 0.99840724 |
| <i>Gm43339</i>       | 20.311789  | 1.89426092 | 0.93045869 | 2.0358356  | 0.04176687 | 0.99840724 |
| <i>Prr7</i>          | 5.8455944  | 5.73338592 | 2.82829208 | 2.02715482 | 0.04264658 | 0.99840724 |

|                      |            |            |            |            |            |            |
|----------------------|------------|------------|------------|------------|------------|------------|
| <i>Slc37a2</i>       | 172.123502 | 0.7142661  | 0.35359563 | 2.02000829 | 0.04338253 | 0.99840724 |
| <i>Car9</i>          | 21.9914294 | 2.48890279 | 1.23677301 | 2.0124168  | 0.04417602 | 0.99840724 |
| <i>Lancl3</i>        | 84.5390048 | 0.89695868 | 0.44735033 | 2.00504751 | 0.04495797 | 0.99840724 |
| <i>St8sia6</i>       | 359.393618 | 0.68368694 | 0.34118152 | 2.00388037 | 0.04508288 | 0.99840724 |
| <i>Soat1</i>         | 1285.95687 | 0.50461065 | 0.25194318 | 2.00287484 | 0.04519072 | 0.99840724 |
| <i>Igkv4-61</i>      | 24.7282299 | 7.81919125 | 3.90827243 | 2.00067713 | 0.0454272  | 0.99840724 |
| <i>Slc27a4</i>       | 76.5821205 | 1.55057692 | 0.77829546 | 1.99227286 | 0.04634113 | 0.99840724 |
| <i>Zfp934</i>        | 50.9128696 | 1.44419271 | 0.72523034 | 1.99135726 | 0.04644162 | 0.99840724 |
| <i>Plcd1</i>         | 13.8194254 | 2.89718475 | 1.45542062 | 1.9906168  | 0.04652303 | 0.99840724 |
| <i>Rps18-ps3</i>     | 58.7449418 | 0.88761114 | 0.4465017  | 1.98792332 | 0.04682017 | 0.99840724 |
| <i>Sdc3</i>          | 365.921729 | 0.7267453  | 0.36629389 | 1.98404976 | 0.04725029 | 0.99840724 |
| <i>Tspan9</i>        | 71.7787747 | 0.97272757 | 0.49070942 | 1.98228838 | 0.04744697 | 0.99840724 |
| <i>Ppp4c</i>         | 2909.36726 | 0.58160806 | 0.29394686 | 1.97861632 | 0.04785922 | 0.99840724 |
| <i>Tnfrsf13c</i>     | 66.8939873 | 1.08829091 | 0.55023255 | 1.97787446 | 0.04794287 | 0.99840724 |
| <i>2610306M01Rik</i> | 33.5468813 | 1.32894502 | 0.673086   | 1.97440598 | 0.0483356  | 0.99840724 |
| <i>Sumf1</i>         | 391.121578 | 0.90279527 | 0.45875411 | 1.96792847 | 0.04907627 | 0.99840724 |
| <i>Gm37593</i>       | 18.776116  | 2.42847455 | 1.23603982 | 1.96472194 | 0.04944643 | 0.99840724 |
| <i>Gm37893</i>       | 15.8542124 | 1.80217252 | 0.91749988 | 1.96422098 | 0.04950447 | 0.99840724 |
| <i>Hacd2</i>         | 191.811166 | 0.69890743 | 0.35598778 | 1.96329051 | 0.04961243 | 0.99840724 |
| <i>F11r</i>          | 37.3696237 | 1.17969282 | 0.60089372 | 1.96323042 | 0.04961941 | 0.99840724 |

**Supplemental table 2. Decreased expression in Tfh of Prdm1 CKO mice compared to CTL mice.**

| <b>Gene</b>     | <b>baseMean</b> | <b>log2FC</b> | <b>lfcSE</b> | <b>stat</b> | <b>pvalue</b> | <b>padj</b> |
|-----------------|-----------------|---------------|--------------|-------------|---------------|-------------|
| <i>Igkv4-70</i> | 16.9614287      | -7.8190248    | 1.91522804   | -4.0825555  | 4.4543E-05    | 0.07409013  |
| <i>Prps111</i>  | 21.6000602      | -3.7016003    | 0.92852404   | -3.9865422  | 6.7043E-05    | 0.09560757  |
| <i>Nbas</i>     | 308.369534      | -0.8372288    | 0.21147732   | -3.958953   | 7.5279E-05    | 0.09560757  |
| <i>Tmem8b</i>   | 44.6664942      | -2.695158     | 0.72022835   | -3.7420882  | 0.0001825     | 0.19188449  |
| <i>Kmt2d</i>    | 4888.60202      | -0.6948023    | 0.18632584   | -3.7289635  | 0.00019227    | 0.19188449  |
| <i>Gm39321</i>  | 30.2113925      | -5.8232136    | 1.57203733   | -3.7042464  | 0.00021202    | 0.19837134  |
| <i>Sorbs1</i>   | 215.275546      | -0.9496841    | 0.25899745   | -3.66677    | 0.00024563    | 0.20597341  |
| <i>Ighv1-36</i> | 37.9794054      | -5.6344549    | 1.54871153   | -3.6381565  | 0.0002746     | 0.20597341  |
| <i>Slc5a3</i>   | 374.837993      | -0.8829601    | 0.24273095   | -3.6376082  | 0.00027518    | 0.20597341  |
| <i>Gm45251</i>  | 20.0176274      | -4.9630393    | 1.42723778   | -3.4773738  | 0.00050635    | 0.31499559  |
| <i>Ddc</i>      | 112.266318      | -1.2305464    | 0.3550112    | -3.4662186  | 0.00052783    | 0.31499559  |
| <i>Ccl5</i>     | 784.048874      | -0.8261983    | 0.23927264   | -3.4529577  | 0.00055448    | 0.31499559  |
| <i>Rgs11</i>    | 179.795405      | -0.939038     | 0.27246998   | -3.4463907  | 0.00056813    | 0.31499559  |
| <i>Cyp1a1</i>   | 38.7732147      | -2.6466584    | 0.78351622   | -3.3779242  | 0.00073035    | 0.39047756  |
| <i>Cldn10</i>   | 90.4423241      | -1.2280507    | 0.36723833   | -3.3440156  | 0.00082575    | 0.4262583   |
| <i>Ahrr</i>     | 31.7030662      | -4.4937373    | 1.35525985   | -3.3157754  | 0.00091389    | 0.4527609   |
| <i>Rbm44</i>    | 41.3346887      | -1.7833891    | 0.53901352   | -3.3086167  | 0.00093758    | 0.4527609   |
| <i>Fcer1a</i>   | 76.1921106      | -1.5742713    | 0.48262046   | -3.261924   | 0.00110659    | 0.47391982  |
| <i>Gm18290</i>  | 9.24790672      | -6.9378229    | 2.15092324   | -3.2255093  | 0.00125749    | 0.47391982  |
| <i>Gm42636</i>  | 38.4841614      | -3.198217     | 0.9930877    | -3.2204779  | 0.00127977    | 0.47391982  |
| <i>Gzma</i>     | 344.300529      | -1.1542184    | 0.35945518   | -3.2110217  | 0.00132264    | 0.47391982  |

|                      |            |            |            |            |            |            |
|----------------------|------------|------------|------------|------------|------------|------------|
| <i>Mysm1</i>         | 1388.12833 | -0.514869  | 0.16055411 | -3.2068252 | 0.00134209 | 0.47391982 |
| <i>Ulk2</i>          | 260.965349 | -0.8499305 | 0.26585908 | -3.1969212 | 0.00138903 | 0.47391982 |
| <i>Cd200r3</i>       | 159.347172 | -1.2480797 | 0.39049989 | -3.1961078 | 0.00139295 | 0.47391982 |
| <i>Gm26732</i>       | 213.02059  | -0.8719369 | 0.27637847 | -3.1548654 | 0.00160572 | 0.5207021  |
| <i>A530041M06Rik</i> | 176.976118 | -1.4761406 | 0.4686719  | -3.1496248 | 0.0016348  | 0.5207021  |
| <i>Zfp407</i>        | 281.756477 | -0.8667542 | 0.27616711 | -3.1385133 | 0.00169807 | 0.52581962 |
| <i>Gm16107</i>       | 10.1779264 | -6.0967184 | 1.95657425 | -3.1160169 | 0.00183312 | 0.54883548 |
| <i>Gm37655</i>       | 29.6511863 | -4.6382711 | 1.49282422 | -3.1070444 | 0.00188968 | 0.55467677 |
| <i>Gm38125</i>       | 11.325855  | -4.5435037 | 1.47373626 | -3.0829829 | 0.00204937 | 0.58276461 |
| <i>Ap1s3</i>         | 33.2507639 | -1.7717624 | 0.57506517 | -3.0809767 | 0.00206323 | 0.58276461 |
| <i>Rnf24</i>         | 69.7114449 | -2.4523854 | 0.80169252 | -3.05901   | 0.0022207  | 0.5935101  |
| <i>Gm29112</i>       | 31.0923762 | -3.77255   | 1.23799432 | -3.047308  | 0.00230901 | 0.5935101  |
| <i>Edaradd</i>       | 42.2314696 | -1.8669919 | 0.61482521 | -3.0366222 | 0.00239245 | 0.5935101  |
| <i>Vps13c</i>        | 405.084437 | -0.9948876 | 0.32806797 | -3.0325655 | 0.00242484 | 0.5935101  |
| <i>Siglec5</i>       | 27.0431463 | -2.4132368 | 0.80407967 | -3.0012409 | 0.00268882 | 0.62758558 |
| <i>Mfsd4a</i>        | 262.571534 | -1.3523637 | 0.45103481 | -2.9983578 | 0.00271439 | 0.62758558 |
| <i>Selp</i>          | 25.6194564 | -3.7330591 | 1.24968849 | -2.9871917 | 0.00281553 | 0.62908205 |
| <i>Nlrc5</i>         | 2529.827   | -0.4986532 | 0.1672505  | -2.9814751 | 0.00286863 | 0.63152129 |
| <i>Gm26947</i>       | 12.9861251 | -6.4573535 | 2.19109629 | -2.947088  | 0.00320782 | 0.68601506 |
| <i>Utrn</i>          | 5638.09225 | -0.6217013 | 0.21339186 | -2.9134258 | 0.00357487 | 0.7330928  |
| <i>Myopos</i>        | 336.309577 | -0.8054994 | 0.27785585 | -2.8989828 | 0.00374375 | 0.75735129 |
| <i>Zc2hc1c</i>       | 23.3579764 | -2.7855122 | 0.96592671 | -2.8837718 | 0.00392943 | 0.78431496 |
| <i>Ggt1</i>          | 74.4093776 | -1.6358382 | 0.56993867 | -2.8702005 | 0.00410212 | 0.80800902 |
| <i>Gm43677</i>       | 13.4616607 | -4.8366909 | 1.71309533 | -2.8233635 | 0.00475227 | 0.90052419 |

|                      |            |            |            |            |            |            |
|----------------------|------------|------------|------------|------------|------------|------------|
| <i>AC122035.2</i>    | 15.6369818 | -3.08665   | 1.10417161 | -2.7954441 | 0.00518285 | 0.93763336 |
| <i>Gm9938</i>        | 17.5241823 | -3.4428343 | 1.232487   | -2.7934042 | 0.00521565 | 0.93763336 |
| <i>Tmod1</i>         | 45.3311499 | -2.2127888 | 0.79375795 | -2.7877375 | 0.00530775 | 0.93763336 |
| <i>Patl2</i>         | 22.1270942 | -2.5178548 | 0.90467407 | -2.7831623 | 0.00538319 | 0.93763336 |
| <i>Stx3</i>          | 110.968299 | -1.2026524 | 0.43407204 | -2.7706285 | 0.00559482 | 0.93763336 |
| <i>1700019J19Rik</i> | 8.84220852 | -5.1534757 | 1.86635517 | -2.7612513 | 0.00575803 | 0.93763336 |
| <i>Ogt</i>           | 4411.57091 | -0.504779  | 0.18296391 | -2.7588992 | 0.00579964 | 0.93763336 |
| <i>Dip2c</i>         | 23.3604032 | -2.5676871 | 0.93599848 | -2.7432599 | 0.00608325 | 0.93841299 |
| <i>Gm10801</i>       | 77.8882276 | -2.7189016 | 0.99172166 | -2.7415974 | 0.00611412 | 0.93841299 |
| <i>Sdccag8</i>       | 513.651651 | -0.6961144 | 0.25396092 | -2.7410294 | 0.0061247  | 0.93841299 |
| <i>Gm7967</i>        | 35.7804051 | -3.1662995 | 1.15696862 | -2.7367203 | 0.0062055  | 0.93841299 |
| <i>Gramd1c</i>       | 94.4573564 | -1.7435261 | 0.63714154 | -2.7364815 | 0.00621001 | 0.93841299 |
| <i>Slc20a1</i>       | 1333.81995 | -0.553335  | 0.20302472 | -2.7254564 | 0.00642126 | 0.94241503 |
| <i>Igkv11-125</i>    | 8.27496562 | -6.7901267 | 2.50253953 | -2.7132945 | 0.00666179 | 0.95783036 |
| <i>Gm36955</i>       | 32.4969766 | -2.8430531 | 1.04922786 | -2.7096622 | 0.00673518 | 0.95783036 |
| <i>Ighv1-4</i>       | 8.46907317 | -4.0087395 | 1.48068654 | -2.7073519 | 0.00678223 | 0.95783036 |
| <i>Psd3</i>          | 27.9038188 | -2.0678032 | 0.76607039 | -2.699234  | 0.00694993 | 0.97234065 |
| <i>Gm37531</i>       | 128.838468 | -1.3667123 | 0.50938332 | -2.6830723 | 0.00729492 | 0.99622089 |
| <i>Wdr60</i>         | 34.4265097 | -2.0929179 | 0.7803826  | -2.6819125 | 0.00732026 | 0.99622089 |
| <i>Ipcef1</i>        | 1492.75196 | -0.7944045 | 0.29718498 | -2.6730976 | 0.00751544 | 0.99704377 |
| <i>Kcnab1</i>        | 24.4718483 | -2.5037515 | 0.93870094 | -2.6672515 | 0.00764744 | 0.99704377 |
| <i>Mtor</i>          | 407.386616 | -0.4987246 | 0.18758872 | -2.6586067 | 0.00784645 | 0.99704377 |
| <i>Gm44661</i>       | 14.2559125 | -3.5858989 | 1.34912593 | -2.6579423 | 0.00786193 | 0.99704377 |
| <i>Ahdcd1</i>        | 128.610736 | -0.8846955 | 0.33319137 | -2.6552174 | 0.00792573 | 0.99704377 |

|                      |            |            |            |            |            |            |
|----------------------|------------|------------|------------|------------|------------|------------|
| <i>Ighv5-17</i>      | 238.888362 | -1.5713886 | 0.59579735 | -2.6374549 | 0.00835307 | 0.99840724 |
| <i>Abcb7</i>         | 318.047276 | -0.7084508 | 0.26922803 | -2.6314154 | 0.008503   | 0.99840724 |
| <i>Fxyd4</i>         | 34.1043789 | -2.1013551 | 0.80112    | -2.6230217 | 0.00871537 | 0.99840724 |
| <i>Gm45407</i>       | 15.9276145 | -2.9780482 | 1.13606716 | -2.6213663 | 0.00875781 | 0.99840724 |
| <i>Rsl1</i>          | 231.942078 | -0.7193917 | 0.27531374 | -2.6129886 | 0.00897543 | 0.99840724 |
| <i>Strc</i>          | 6.28681625 | -4.647832  | 1.78529631 | -2.6033953 | 0.00923055 | 0.99840724 |
| <i>Kif1b</i>         | 679.801641 | -0.6731311 | 0.25966618 | -2.5922941 | 0.00953382 | 0.99840724 |
| <i>Ighv2-2</i>       | 104.901205 | -1.4330906 | 0.55569927 | -2.5788958 | 0.00991167 | 0.99840724 |
| <i>Slc2a4rg-ps</i>   | 684.169281 | -0.5353207 | 0.20935301 | -2.5570239 | 0.0105572  | 0.99840724 |
| <i>Gm48138</i>       | 25.7479376 | -2.322956  | 0.91166716 | -2.5480308 | 0.01083329 | 0.99840724 |
| <i>Cd28</i>          | 4684.44757 | -0.370443  | 0.14555128 | -2.545103  | 0.01092455 | 0.99840724 |
| <i>Epn2</i>          | 34.6532549 | -2.3407623 | 0.9243763  | -2.5322612 | 0.01133295 | 0.99840724 |
| <i>A930024E05Rik</i> | 84.0906746 | -0.9375064 | 0.37036269 | -2.5313199 | 0.01136342 | 0.99840724 |
| <i>Tmem267</i>       | 19.6125133 | -2.3856181 | 0.94378916 | -2.5277024 | 0.01148116 | 0.99840724 |
| <i>Secisbp2</i>      | 774.452536 | -0.5372006 | 0.21280508 | -2.5243785 | 0.0115903  | 0.99840724 |
| <i>9430018G01Rik</i> | 10.9378933 | -5.4895039 | 2.17979397 | -2.5183591 | 0.01179031 | 0.99840724 |
| <i>Pibf1</i>         | 314.306454 | -0.8999261 | 0.35736026 | -2.5182601 | 0.01179362 | 0.99840724 |
| <i>Ms4a2</i>         | 172.421249 | -1.5998607 | 0.63667691 | -2.5128298 | 0.01197671 | 0.99840724 |
| <i>Dnajc16</i>       | 201.795012 | -0.6927238 | 0.27584544 | -2.5112752 | 0.01202959 | 0.99840724 |
| <i>Josd1</i>         | 193.747549 | -1.3537592 | 0.53991352 | -2.5073631 | 0.01216357 | 0.99840724 |
| <i>Gm43421</i>       | 17.4107253 | -2.8441393 | 1.13682246 | -2.5018324 | 0.01235524 | 0.99840724 |
| <i>Ramp3</i>         | 93.306793  | -1.1608502 | 0.46462809 | -2.4984502 | 0.01247377 | 0.99840724 |
| <i>Ranbp2</i>        | 874.411308 | -0.7599332 | 0.30523224 | -2.4896884 | 0.01278551 | 0.99840724 |
| <i>Gm26551</i>       | 263.672586 | -1.0948356 | 0.440152   | -2.4874034 | 0.01286794 | 0.99840724 |

|                      |            |            |            |            |            |            |
|----------------------|------------|------------|------------|------------|------------|------------|
| <i>Ccl4</i>          | 228.835877 | -1.0816041 | 0.43595721 | -2.4809869 | 0.01310192 | 0.99840724 |
| <i>Agl</i>           | 140.972867 | -1.0930985 | 0.44081223 | -2.4797372 | 0.01314793 | 0.99840724 |
| <i>Plod1</i>         | 250.51639  | -0.7527149 | 0.30405288 | -2.4756051 | 0.01330106 | 0.99840724 |
| <i>Zfp738</i>        | 268.701592 | -0.5987956 | 0.24285586 | -2.4656419 | 0.0136768  | 0.99840724 |
| <i>Inpp4b</i>        | 4210.99399 | -0.5796571 | 0.23565681 | -2.4597509 | 0.01390335 | 0.99840724 |
| <i>Gm48855</i>       | 65.8593189 | -1.4134949 | 0.57507183 | -2.4579449 | 0.01397346 | 0.99840724 |
| <i>Gm40309</i>       | 285.563814 | -0.8340056 | 0.33952013 | -2.4564246 | 0.01403272 | 0.99840724 |
| <i>Gon4l</i>         | 195.343404 | -0.8427945 | 0.34317552 | -2.4558701 | 0.01405439 | 0.99840724 |
| <i>9530085L11Rik</i> | 21.2218235 | -2.6526404 | 1.08221396 | -2.4511239 | 0.01424109 | 0.99840724 |
| <i>Mical2</i>        | 74.6749897 | -1.4561454 | 0.59419521 | -2.4506179 | 0.01426113 | 0.99840724 |
| <i>Gm43336</i>       | 78.0822455 | -1.4482645 | 0.59119014 | -2.449744  | 0.01429578 | 0.99840724 |
| <i>Gm37906</i>       | 98.5802799 | -1.6270941 | 0.66439133 | -2.4489997 | 0.01432536 | 0.99840724 |
| <i>Adamts14</i>      | 53.7611846 | -2.2269479 | 0.91089054 | -2.444803  | 0.01449313 | 0.99840724 |
| <i>Dock8</i>         | 1608.20557 | -0.4408688 | 0.18060947 | -2.441006  | 0.01464641 | 0.99840724 |
| <i>Lypd6b</i>        | 164.131411 | -0.9708797 | 0.39809938 | -2.4387872 | 0.01473664 | 0.99840724 |
| <i>Slmap</i>         | 337.56977  | -0.8575688 | 0.35251671 | -2.432704  | 0.01498655 | 0.99840724 |
| <i>Syt12</i>         | 396.826593 | -0.8264915 | 0.33980075 | -2.4322827 | 0.01500399 | 0.99840724 |
| <i>Gm10388</i>       | 18.3605513 | -2.6658437 | 1.0968197  | -2.4305214 | 0.01507712 | 0.99840724 |
| <i>Jag2</i>          | 58.5207753 | -2.1820143 | 0.90164452 | -2.4200383 | 0.01551887 | 0.99840724 |
| <i>Ankrd44</i>       | 2542.55626 | -0.4863623 | 0.20116765 | -2.4176965 | 0.0156191  | 0.99840724 |
| <i>Gm43589</i>       | 7.38856567 | -6.6189784 | 2.74574226 | -2.4106336 | 0.01592484 | 0.99840724 |
| <i>Zfp949</i>        | 322.481174 | -0.563633  | 0.23405981 | -2.4080725 | 0.016037   | 0.99840724 |
| <i>Gm48314</i>       | 21.5772469 | -2.1253709 | 0.88264175 | -2.4079655 | 0.0160417  | 0.99840724 |
| <i>Ice1</i>          | 505.371415 | -0.9673703 | 0.40188667 | -2.4070723 | 0.01608099 | 0.99840724 |

|                      |            |            |            |            |            |            |
|----------------------|------------|------------|------------|------------|------------|------------|
| <i>Trbv29</i>        | 107.642108 | -0.9008787 | 0.37452407 | -2.4053959 | 0.01615495 | 0.99840724 |
| <i>Pcdhgc4</i>       | 52.8562182 | -1.9358218 | 0.80553824 | -2.4031407 | 0.01625493 | 0.99840724 |
| <i>Gm47585</i>       | 200.543166 | -1.1046758 | 0.45970705 | -2.4029995 | 0.01626121 | 0.99840724 |
| <i>Nmt2</i>          | 926.307618 | -0.611684  | 0.25487181 | -2.3999674 | 0.01639653 | 0.99840724 |
| <i>Gm45884</i>       | 38.6526984 | -2.1355035 | 0.89069172 | -2.3975787 | 0.01650383 | 0.99840724 |
| <i>D130062J10Rik</i> | 42.1992788 | -2.0229221 | 0.84479935 | -2.3945593 | 0.01664035 | 0.99840724 |
| <i>Sla2</i>          | 896.496774 | -0.4050759 | 0.16923514 | -2.3935685 | 0.01668537 | 0.99840724 |
| <i>Tmem185b</i>      | 648.914537 | -0.5875923 | 0.2462023  | -2.3866238 | 0.01700388 | 0.99840724 |
| <i>Gm48624</i>       | 41.2013858 | -2.2112087 | 0.92770101 | -2.383536  | 0.01714721 | 0.99840724 |
| <i>Gm5122</i>        | 11.4664655 | -5.5714108 | 2.3400491  | -2.3808948 | 0.01727064 | 0.99840724 |
| <i>6030400A10Rik</i> | 16.7260472 | -2.3662575 | 0.99494452 | -2.3782809 | 0.01739357 | 0.99840724 |
| <i>Gm18646</i>       | 34.5873569 | -2.2020397 | 0.93555453 | -2.3537268 | 0.01858627 | 0.99840724 |
| <i>Gm42989</i>       | 6.94255958 | -6.5291258 | 2.77557044 | -2.3523546 | 0.01865498 | 0.99840724 |
| <i>AC154562.1</i>    | 5.36958915 | -5.1607673 | 2.20098064 | -2.3447582 | 0.01903942 | 0.99840724 |
| <i>Smyd4</i>         | 349.620507 | -0.6614441 | 0.28221916 | -2.3437249 | 0.01909225 | 0.99840724 |
| <i>Ranbp10</i>       | 439.11948  | -0.6862196 | 0.29293286 | -2.3425831 | 0.01915077 | 0.99840724 |
| <i>Kif21b</i>        | 2162.84224 | -0.3130098 | 0.1336638  | -2.3417692 | 0.01919258 | 0.99840724 |
| <i>Spg11</i>         | 333.334773 | -0.7414733 | 0.317191   | -2.3376241 | 0.01940676 | 0.99840724 |
| <i>Tub</i>           | 24.4090193 | -3.042626  | 1.30305464 | -2.3349949 | 0.01954368 | 0.99840724 |
| <i>Dennd1c</i>       | 2765.59536 | -0.3594043 | 0.1539302  | -2.3348527 | 0.01955112 | 0.99840724 |
| <i>Dnd1</i>          | 38.8503001 | -2.3846603 | 1.02594614 | -2.3243523 | 0.02010662 | 0.99840724 |
| <i>Gm13710</i>       | 16.553112  | 3.31175025 | 1.42589276 | 2.32258017 | 0.02020172 | 0.99840724 |
| <i>E230034D01Rik</i> | 31.7144779 | -1.4694101 | 0.63292219 | -2.3216283 | 0.02025296 | 0.99840724 |
| <i>Slc7a8</i>        | 139.189507 | -1.1640979 | 0.50218958 | -2.3180446 | 0.0204469  | 0.99840724 |

|                      |            |            |            |            |            |            |
|----------------------|------------|------------|------------|------------|------------|------------|
| <i>Mtg1</i>          | 359.972546 | -0.5292611 | 0.22877284 | -2.3134789 | 0.02069632 | 0.99840724 |
| <i>Gm17195</i>       | 18.6517231 | -2.0570916 | 0.89052845 | -2.3099673 | 0.02088996 | 0.99840724 |
| <i>Rasl10a</i>       | 7.23314026 | -5.6028484 | 2.43682082 | -2.2992451 | 0.02149102 | 0.99840724 |
| <i>Gm37423</i>       | 124.351854 | -1.1411537 | 0.49718652 | -2.2952225 | 0.02172038 | 0.99840724 |
| <i>Gm10614</i>       | 12.2687317 | -3.6211576 | 1.57778113 | -2.295095  | 0.02172768 | 0.99840724 |
| <i>Gm38118</i>       | 169.75658  | -1.3089128 | 0.57291636 | -2.2846491 | 0.02233341 | 0.99840724 |
| <i>Gm16845</i>       | 37.9174981 | -1.4260662 | 0.62626543 | -2.2770954 | 0.02278053 | 0.99840724 |
| <i>Gm37598</i>       | 15.943482  | -2.6966982 | 1.1852859  | -2.2751458 | 0.02289718 | 0.99840724 |
| <i>Pkd1</i>          | 701.443876 | -0.5470703 | 0.24050692 | -2.274655  | 0.02292663 | 0.99840724 |
| <i>Gm44851</i>       | 10.3839324 | -3.8670126 | 1.70101048 | -2.273362  | 0.02300437 | 0.99840724 |
| <i>Zfx</i>           | 420.65795  | -0.5294226 | 0.23292176 | -2.2729633 | 0.02302839 | 0.99840724 |
| <i>Gm43672</i>       | 162.172168 | -1.0791538 | 0.47546981 | -2.2696579 | 0.02322835 | 0.99840724 |
| <i>Hgf</i>           | 118.453407 | -1.0082021 | 0.44452318 | -2.268053  | 0.02332598 | 0.99840724 |
| <i>4930444A19Rik</i> | 45.3604243 | -1.5636092 | 0.68964963 | -2.2672516 | 0.02337486 | 0.99840724 |
| <i>Ccdc97</i>        | 805.336588 | -0.3934977 | 0.17358291 | -2.2669149 | 0.02339543 | 0.99840724 |
| <i>Rab11fip3</i>     | 97.6945342 | -1.015992  | 0.44988966 | -2.2583137 | 0.02392611 | 0.99840724 |
| <i>Gucy1a1</i>       | 234.496577 | -0.6321113 | 0.27996055 | -2.2578583 | 0.02395449 | 0.99840724 |
| <i>Gm38387</i>       | 17.5947728 | -2.099311  | 0.93035805 | -2.2564549 | 0.02404216 | 0.99840724 |
| <i>Cd8a</i>          | 19.2562541 | -2.050607  | 0.90908285 | -2.2556877 | 0.02409019 | 0.99840724 |
| <i>Nr3c1</i>         | 1097.3664  | -0.5678488 | 0.25196152 | -2.2537123 | 0.02421427 | 0.99840724 |
| <i>Tpbp</i>          | 10.0351371 | -7.0611036 | 3.13350956 | -2.2534169 | 0.02423287 | 0.99840724 |
| <i>Gm37166</i>       | 13.2350158 | -2.9243744 | 1.30296981 | -2.2443915 | 0.02480722 | 0.99840724 |
| <i>A730011C13Rik</i> | 79.5234695 | -1.0157865 | 0.45376531 | -2.2385724 | 0.02518375 | 0.99840724 |
| <i>mt-Co1</i>        | 62897.317  | -0.6392328 | 0.28557155 | -2.238433  | 0.02519283 | 0.99840724 |

|                      |            |            |            |            |            |            |
|----------------------|------------|------------|------------|------------|------------|------------|
| <i>Tbc1d2b</i>       | 623.220577 | -0.4947272 | 0.22103089 | -2.2382717 | 0.02520335 | 0.99840724 |
| <i>Heatr5a</i>       | 362.479919 | -0.9922809 | 0.44376177 | -2.2360666 | 0.02534741 | 0.99840724 |
| <i>Kdm3b</i>         | 628.296946 | -0.5823616 | 0.26060505 | -2.2346521 | 0.0254402  | 0.99840724 |
| <i>Hsf1</i>          | 1025.84488 | -0.3739532 | 0.16752962 | -2.2321619 | 0.02560427 | 0.99840724 |
| <i>Acvr1c</i>        | 7.96728154 | -5.0328307 | 2.25840065 | -2.2284933 | 0.02584764 | 0.99840724 |
| <i>2810403D21Rik</i> | 59.6123257 | -1.2111725 | 0.54361871 | -2.2279815 | 0.02588175 | 0.99840724 |
| <i>Gm4759</i>        | 2028.59807 | -0.6387364 | 0.28677556 | -2.2273043 | 0.02592694 | 0.99840724 |
| <i>Itga4</i>         | 4824.3197  | -0.4793327 | 0.21543591 | -2.2249433 | 0.02608505 | 0.99840724 |
| <i>Zbtb24</i>        | 672.850602 | -0.447973  | 0.20207517 | -2.2168634 | 0.02663243 | 0.99840724 |
| <i>Ndr3</i>          | 1691.60478 | -0.4356026 | 0.1967554  | -2.2139294 | 0.02683364 | 0.99840724 |
| <i>Edem3</i>         | 156.0268   | -1.1449727 | 0.5173461  | -2.2131657 | 0.02688622 | 0.99840724 |
| <i>Kat6a</i>         | 1118.07643 | -0.5238516 | 0.23674518 | -2.2127235 | 0.02691671 | 0.99840724 |
| <i>Gm1966</i>        | 1991.96617 | -0.3689311 | 0.1667716  | -2.2121939 | 0.02695327 | 0.99840724 |
| <i>Zbtb3</i>         | 40.6059493 | -1.6003194 | 0.72350966 | -2.211884  | 0.02697468 | 0.99840724 |
| <i>Nisch</i>         | 3058.00664 | -0.465888  | 0.21092498 | -2.2087855 | 0.02718957 | 0.99840724 |
| <i>Spin4</i>         | 18.8168323 | -2.5400921 | 1.15026521 | -2.2082665 | 0.0272257  | 0.99840724 |
| <i>Tmem39b</i>       | 116.683668 | -0.7575137 | 0.34338118 | -2.2060433 | 0.02738097 | 0.99840724 |
| <i>Rhoh</i>          | 4741.23711 | -0.2860905 | 0.1299286  | -2.2019058 | 0.02767197 | 0.99840724 |
| <i>Macf1</i>         | 4246.36174 | -0.6079467 | 0.27613585 | -2.2016218 | 0.02769203 | 0.99840724 |
| <i>Adamts17</i>      | 7.74427849 | -4.9913503 | 2.26731693 | -2.2014348 | 0.02770526 | 0.99840724 |
| <i>Trdmt1</i>        | 235.999482 | -0.9514486 | 0.43228822 | -2.2009588 | 0.02773894 | 0.99840724 |
| <i>Adamts6</i>       | 381.61669  | -0.9394089 | 0.42725072 | -2.1987298 | 0.02789714 | 0.99840724 |
| <i>Zfp831</i>        | 538.318372 | -0.8725576 | 0.39699363 | -2.1979133 | 0.02795528 | 0.99840724 |
| <i>Calcr1</i>        | 235.306806 | -0.9717393 | 0.44255402 | -2.195753  | 0.02810963 | 0.99840724 |

|                      |            |            |            |            |            |            |
|----------------------|------------|------------|------------|------------|------------|------------|
| <i>Tex15</i>         | 90.8285743 | -1.9524001 | 0.88952383 | -2.1948822 | 0.02817205 | 0.99840724 |
| <i>Gm46367</i>       | 15.825102  | -2.4883611 | 1.13486041 | -2.1926583 | 0.02833201 | 0.99840724 |
| <i>Mylk2</i>         | 11.889765  | -2.6453501 | 1.20910953 | -2.1878499 | 0.02868054 | 0.99840724 |
| <i>Mid2</i>          | 15.5641635 | -3.2140314 | 1.47015618 | -2.1861837 | 0.02880217 | 0.99840724 |
| <i>Neb</i>           | 222.479105 | -1.2324345 | 0.56378386 | -2.1860052 | 0.02881522 | 0.99840724 |
| <i>Gdpd3</i>         | 23.2694239 | -1.7143538 | 0.78485697 | -2.1842881 | 0.02894108 | 0.99840724 |
| <i>Gm45358</i>       | 7.80812353 | -4.0322299 | 1.84954216 | -2.1801232 | 0.02924833 | 0.99840724 |
| <i>Gm45191</i>       | 140.018557 | -1.2347258 | 0.56756447 | -2.1754812 | 0.02959408 | 0.99840724 |
| <i>Msh3</i>          | 492.619535 | -0.4638092 | 0.21339463 | -2.1734812 | 0.02974412 | 0.99840724 |
| <i>Gprin3</i>        | 874.062188 | -0.6395844 | 0.29432597 | -2.173048  | 0.02977671 | 0.99840724 |
| <i>Chst2</i>         | 379.921135 | -0.6453494 | 0.29753809 | -2.1689641 | 0.03008541 | 0.99840724 |
| <i>Chd7</i>          | 791.168899 | -0.6006034 | 0.27697102 | -2.1684702 | 0.03012293 | 0.99840724 |
| <i>Gm13357</i>       | 13.4457366 | -2.3239293 | 1.0727706  | -2.1662872 | 0.03028924 | 0.99840724 |
| <i>Cep192</i>        | 709.782663 | -0.4421659 | 0.20431825 | -2.1641038 | 0.03045638 | 0.99840724 |
| <i>Ctns</i>          | 326.458623 | -0.526676  | 0.24344034 | -2.1634707 | 0.030505   | 0.99840724 |
| <i>Polr2a</i>        | 1553.50152 | -0.4637125 | 0.21469514 | -2.159865  | 0.03078312 | 0.99840724 |
| <i>4732491K20Rik</i> | 16.7766711 | -2.8581495 | 1.32414966 | -2.1584792 | 0.03089059 | 0.99840724 |
| <i>lft172</i>        | 141.037791 | -0.7953097 | 0.36848686 | -2.1583123 | 0.03090356 | 0.99840724 |
| <i>Krba1</i>         | 664.911017 | -0.7822439 | 0.36252143 | -2.1577867 | 0.03094442 | 0.99840724 |
| <i>Strbp</i>         | 255.632087 | -0.6245917 | 0.28959388 | -2.1567847 | 0.03102244 | 0.99840724 |
| <i>2700046G09Rik</i> | 6.89316205 | -3.3892446 | 1.57179966 | -2.1562828 | 0.03106159 | 0.99840724 |
| <i>Ghrl</i>          | 15.914267  | -4.5197677 | 2.09838453 | -2.1539273 | 0.03124587 | 0.99840724 |
| <i>Kcnc2</i>         | 31.3501635 | -2.5366811 | 1.17939241 | -2.1508372 | 0.03148905 | 0.99840724 |
| <i>Gm45597</i>       | 10.3420909 | -3.2081232 | 1.49220114 | -2.1499268 | 0.031561   | 0.99840724 |

|                 |            |            |            |            |            |            |
|-----------------|------------|------------|------------|------------|------------|------------|
| <i>Gm37019</i>  | 66.7046315 | -1.432464  | 0.66680926 | -2.1482365 | 0.03169497 | 0.99840724 |
| <i>Suco</i>     | 537.36573  | -0.5785691 | 0.26942709 | -2.1474051 | 0.03176104 | 0.99840724 |
| <i>Rabgap1</i>  | 561.806728 | -0.6272519 | 0.29239368 | -2.1452306 | 0.03193442 | 0.99840724 |
| <i>Snx29</i>    | 191.878555 | -0.7639418 | 0.35636703 | -2.1436938 | 0.03205743 | 0.99840724 |
| <i>Uros</i>     | 514.075406 | -0.5015981 | 0.23439222 | -2.1399947 | 0.0323552  | 0.99840724 |
| <i>Fam220a</i>  | 129.285856 | -1.2673634 | 0.59330701 | -2.1361005 | 0.03267122 | 0.99840724 |
| <i>mt-Cytb</i>  | 33162.6723 | -0.6034689 | 0.2826556  | -2.1349971 | 0.03276125 | 0.99840724 |
| <i>Kiz</i>      | 395.946704 | -0.8715631 | 0.40863942 | -2.1328416 | 0.03293773 | 0.99840724 |
| <i>Pipox</i>    | 24.9695933 | -1.5492708 | 0.72676104 | -2.1317472 | 0.03302763 | 0.99840724 |
| <i>Gm37510</i>  | 71.0694511 | -1.2444871 | 0.58401203 | -2.1309271 | 0.03309515 | 0.99840724 |
| <i>Adk</i>      | 1447.43721 | -0.285097  | 0.13386532 | -2.1297305 | 0.03319387 | 0.99840724 |
| <i>Rasgef1a</i> | 81.4104833 | -0.8831768 | 0.41482649 | -2.1290271 | 0.03325202 | 0.99840724 |
| <i>Gm26740</i>  | 1080.8178  | -0.484508  | 0.22793732 | -2.1256196 | 0.03353495 | 0.99840724 |
| <i>Fmr1nb</i>   | 5.45999925 | -6.1809629 | 2.90914153 | -2.124669  | 0.03361424 | 0.99840724 |
| <i>Gm38244</i>  | 756.446391 | -0.7264342 | 0.34196145 | -2.1243161 | 0.03364372 | 0.99840724 |
| <i>Gemin5</i>   | 539.152248 | -0.6753111 | 0.31825067 | -2.1219471 | 0.03384218 | 0.99840724 |
| <i>Cd4</i>      | 10121.698  | -0.2960374 | 0.13962731 | -2.1201973 | 0.03398941 | 0.99840724 |
| <i>Gm37931</i>  | 15.9600723 | -3.3097486 | 1.5626712  | -2.118007  | 0.03417447 | 0.99840724 |
| <i>Nav2</i>     | 383.88428  | -0.7326012 | 0.34595315 | -2.1176313 | 0.0342063  | 0.99840724 |
| <i>Slc22a23</i> | 23.0090428 | -2.9882429 | 1.41237519 | -2.1157571 | 0.03436547 | 0.99840724 |
| <i>Zfp282</i>   | 270.775343 | -0.4716006 | 0.22315346 | -2.1133467 | 0.0345711  | 0.99840724 |
| <i>Gm17130</i>  | 28.1245297 | -2.0178191 | 0.95487428 | -2.1131777 | 0.03458556 | 0.99840724 |
| <i>Esco1</i>    | 1178.67548 | -0.5057314 | 0.23934218 | -2.1130057 | 0.03460028 | 0.99840724 |
| <i>lqsec1</i>   | 302.442504 | -0.6978878 | 0.330491   | -2.1116696 | 0.0347148  | 0.99840724 |

|                      |            |            |            |            |            |            |
|----------------------|------------|------------|------------|------------|------------|------------|
| <i>Gm11926</i>       | 5.70131025 | -6.2446807 | 2.95826845 | -2.1109243 | 0.03477882 | 0.99840724 |
| <i>Tmem186</i>       | 461.781234 | -0.6631592 | 0.31417901 | -2.1107685 | 0.03479221 | 0.99840724 |
| <i>Mturn</i>         | 200.563783 | -1.1071536 | 0.52562832 | -2.1063432 | 0.03517455 | 0.99840724 |
| <i>Gm13213</i>       | 16.7977888 | -2.2021409 | 1.04549796 | -2.1063081 | 0.03517759 | 0.99840724 |
| <i>Pou2af1</i>       | 518.324618 | -0.599401  | 0.28459649 | -2.1061434 | 0.0351919  | 0.99840724 |
| <i>Gm47358</i>       | 8.47411575 | -6.8170763 | 3.23997277 | -2.1040536 | 0.03537377 | 0.99840724 |
| <i>Ak8</i>           | 20.2872668 | -2.1223686 | 1.00964753 | -2.1020886 | 0.03554552 | 0.99840724 |
| <i>Inpp4a</i>        | 1399.67693 | -0.4040271 | 0.19239562 | -2.0999805 | 0.03573055 | 0.99840724 |
| <i>Gm37485</i>       | 7.14257316 | -4.873362  | 2.32076425 | -2.0998953 | 0.03573805 | 0.99840724 |
| <i>Gm6566</i>        | 19.0333811 | -2.2761217 | 1.08456661 | -2.0986463 | 0.03584809 | 0.99840724 |
| <i>Cradd</i>         | 156.016256 | -0.6958656 | 0.33165941 | -2.0981331 | 0.03589339 | 0.99840724 |
| <i>Gm27042</i>       | 40.2008896 | -1.9574557 | 0.93371447 | -2.0964178 | 0.03604514 | 0.99840724 |
| <i>Gm2986</i>        | 10.1475881 | -3.3260108 | 1.58711545 | -2.0956326 | 0.0361148  | 0.99840724 |
| <i>Etohd2</i>        | 85.3414263 | -1.0429724 | 0.49829607 | -2.0930777 | 0.03634222 | 0.99840724 |
| <i>Man2a2</i>        | 438.028322 | -0.7155377 | 0.34186663 | -2.0930317 | 0.03634632 | 0.99840724 |
| <i>Numa1</i>         | 2555.57233 | -0.4677172 | 0.22348063 | -2.092876  | 0.03636023 | 0.99840724 |
| <i>Hba-ps4</i>       | 5.06176626 | -6.0735693 | 2.90360249 | -2.0917358 | 0.03646215 | 0.99840724 |
| <i>Nxn</i>           | 48.6318311 | -1.457382  | 0.69879238 | -2.0855723 | 0.03701739 | 0.99840724 |
| <i>Adcy10</i>        | 14.1431539 | -4.7149531 | 2.2619584  | -2.0844561 | 0.0371187  | 0.99840724 |
| <i>Rccd1</i>         | 213.153348 | -0.7392988 | 0.35492311 | -2.0829829 | 0.03725278 | 0.99840724 |
| <i>C530050E15Rik</i> | 260.273416 | -1.1525187 | 0.55342377 | -2.0825248 | 0.03729456 | 0.99840724 |
| <i>Gm10033</i>       | 187.257659 | -0.7449673 | 0.35774669 | -2.0823877 | 0.03730707 | 0.99840724 |
| <i>Gm48207</i>       | 8.25111271 | -6.7785862 | 3.25782873 | -2.0807067 | 0.03746076 | 0.99840724 |
| <i>Plp1</i>          | 39.9654944 | -2.0199578 | 0.97202757 | -2.078087  | 0.03770135 | 0.99840724 |

|                      |            |            |            |            |            |            |
|----------------------|------------|------------|------------|------------|------------|------------|
| <i>Gm43162</i>       | 48.0608702 | -1.2399327 | 0.59734688 | -2.0757331 | 0.03791865 | 0.99840724 |
| <i>Gm31834</i>       | 12.6861814 | -3.7585122 | 1.81160955 | -2.0746811 | 0.0380161  | 0.99840724 |
| <i>Slc4a11</i>       | 14.4174773 | -3.7832316 | 1.82428921 | -2.0738113 | 0.03809684 | 0.99840724 |
| <i>Hpn</i>           | 87.9799022 | -1.1022556 | 0.53182939 | -2.0725738 | 0.03821197 | 0.99840724 |
| <i>Gm15859</i>       | 24.0778445 | -2.1810827 | 1.05287553 | -2.0715484 | 0.03830757 | 0.99840724 |
| <i>Lin52</i>         | 206.23745  | -0.5884592 | 0.28412865 | -2.0711014 | 0.03834932 | 0.99840724 |
| <i>Ppic</i>          | 209.642862 | -1.2130318 | 0.58845401 | -2.0613876 | 0.03926608 | 0.99840724 |
| <i>Zfp791</i>        | 17.2932937 | -4.0054813 | 1.94528061 | -2.0590763 | 0.03948693 | 0.99840724 |
| <i>Glt28d2</i>       | 38.682685  | -1.2211645 | 0.59313151 | -2.0588427 | 0.03950931 | 0.99840724 |
| <i>Kcna2</i>         | 77.008628  | -1.2943918 | 0.63069689 | -2.0523199 | 0.04013858 | 0.99840724 |
| <i>Tshz1</i>         | 288.986226 | -0.7772137 | 0.37878903 | -2.0518379 | 0.04018542 | 0.99840724 |
| <i>D130043K22Rik</i> | 25.5965698 | -2.0255924 | 0.9881391  | -2.0499062 | 0.04037359 | 0.99840724 |
| <i>Trip11</i>        | 1077.63484 | -0.5266711 | 0.25704422 | -2.0489514 | 0.04046687 | 0.99840724 |
| <i>Zfp595</i>        | 218.31319  | -0.9666901 | 0.47200866 | -2.0480346 | 0.04055661 | 0.99840724 |
| <i>Tet3</i>          | 1354.69031 | -0.5124171 | 0.25042154 | -2.046218  | 0.04073492 | 0.99840724 |
| <i>St8sia4</i>       | 1127.58349 | -0.7227001 | 0.35320703 | -2.046109  | 0.04074564 | 0.99840724 |
| <i>Gm43024</i>       | 32.6518232 | -2.7287375 | 1.33549538 | -2.04324   | 0.04102869 | 0.99840724 |
| <i>Pogk</i>          | 216.663015 | -0.7351137 | 0.35996819 | -2.0421629 | 0.04113538 | 0.99840724 |
| <i>Zfp862-ps</i>     | 228.024588 | -0.9349232 | 0.45826661 | -2.0401295 | 0.04133743 | 0.99840724 |
| <i>Abca1</i>         | 160.473329 | -0.7434567 | 0.3646636  | -2.0387468 | 0.04147531 | 0.99840724 |
| <i>Gm43328</i>       | 53.7552415 | -1.4715312 | 0.72349637 | -2.0339164 | 0.04196002 | 0.99840724 |
| <i>Sbk1</i>          | 227.920392 | -0.6004437 | 0.29523048 | -2.0338134 | 0.04197041 | 0.99840724 |
| <i>Ighv7-4</i>       | 8.69014321 | -5.8684767 | 2.88653381 | -2.0330532 | 0.04204715 | 0.99840724 |
| <i>Acad11</i>        | 204.295017 | -0.8344835 | 0.41048567 | -2.0329175 | 0.04206086 | 0.99840724 |

|                      |            |            |            |            |            |            |
|----------------------|------------|------------|------------|------------|------------|------------|
| <i>Mrgprb1</i>       | 7.80510662 | -6.6983809 | 3.29598749 | -2.0322835 | 0.04212497 | 0.99840724 |
| <i>Gm29480</i>       | 7.80510662 | -6.6983809 | 3.29598749 | -2.0322835 | 0.04212497 | 0.99840724 |
| <i>Gm17816</i>       | 49.1161193 | -1.1099778 | 0.54692521 | -2.0294873 | 0.04240868 | 0.99840724 |
| <i>Kifc2</i>         | 170.680661 | -0.7761121 | 0.3829216  | -2.0268171 | 0.04268112 | 0.99840724 |
| <i>Apc</i>           | 571.411415 | -0.8023632 | 0.39627447 | -2.0247663 | 0.04289137 | 0.99840724 |
| <i>Gm19967</i>       | 19.1046379 | -1.7964789 | 0.88732945 | -2.0245907 | 0.04290941 | 0.99840724 |
| <i>Gm42659</i>       | 203.28905  | -0.6738463 | 0.3341183  | -2.0167895 | 0.04371748 | 0.99840724 |
| <i>Ptprk</i>         | 43.630238  | -1.8595242 | 0.92234637 | -2.0160801 | 0.0437916  | 0.99840724 |
| <i>4833421G17Rik</i> | 169.660502 | -1.0499248 | 0.52178357 | -2.0121845 | 0.04420049 | 0.99840724 |
| <i>Pax9</i>          | 7.58210357 | -6.6565428 | 3.31641539 | -2.0071499 | 0.0447337  | 0.99840724 |
| <i>4930563J15Rik</i> | 7.58210357 | -6.6565428 | 3.31641539 | -2.0071499 | 0.0447337  | 0.99840724 |
| <i>Tab1</i>          | 663.595576 | -0.5326745 | 0.26557519 | -2.0057389 | 0.04488412 | 0.99840724 |
| <i>Papd7</i>         | 149.121718 | -1.0243049 | 0.5111792  | -2.0038078 | 0.04509065 | 0.99840724 |
| <i>Klf12</i>         | 24.3335318 | -2.0723456 | 1.03559296 | -2.0011198 | 0.04537948 | 0.99840724 |
| <i>Mpg</i>           | 243.214605 | -0.5055133 | 0.25284027 | -1.9993385 | 0.04557174 | 0.99840724 |
| <i>Zfyve26</i>       | 524.658544 | -0.5791666 | 0.28998781 | -1.9972103 | 0.04580234 | 0.99840724 |
| <i>BC043934</i>      | 223.870429 | -0.7153476 | 0.35819105 | -1.9971119 | 0.04581303 | 0.99840724 |
| <i>AC163354.1</i>    | 36.2729504 | -1.6590883 | 0.83123249 | -1.9959377 | 0.0459407  | 0.99840724 |
| <i>Gm37215</i>       | 52.758322  | -1.6193867 | 0.8124306  | -1.9932615 | 0.04623281 | 0.99840724 |
| <i>Exp5</i>          | 54.5353593 | -1.227522  | 0.61685975 | -1.9899531 | 0.0465961  | 0.99840724 |
| <i>Tnk2</i>          | 242.194511 | -0.5316413 | 0.2671708  | -1.9898928 | 0.04660275 | 0.99840724 |
| <i>Trav17</i>        | 44.6907377 | -1.0225061 | 0.51424373 | -1.9883687 | 0.04677093 | 0.99840724 |
| <i>Gm6855</i>        | 6.05936361 | -4.5360418 | 2.28183696 | -1.9878904 | 0.04682381 | 0.99840724 |
| <i>Dnajc12</i>       | 56.4342    | -1.3952967 | 0.70337884 | -1.9837058 | 0.04728865 | 0.99840724 |

|                      |            |            |            |            |            |            |
|----------------------|------------|------------|------------|------------|------------|------------|
| <i>Eme2</i>          | 204.46877  | -0.7193952 | 0.36276221 | -1.9831041 | 0.0473558  | 0.99840724 |
| <i>Khdc1a</i>        | 11.62864   | -3.9737212 | 2.00532531 | -1.9815843 | 0.04752578 | 0.99840724 |
| <i>A430078I02Rik</i> | 11.1939951 | -2.7905265 | 1.40938667 | -1.9799581 | 0.04770824 | 0.99840724 |
| <i>Sh3d19</i>        | 60.1898424 | -1.1168044 | 0.5642235  | -1.9793652 | 0.0477749  | 0.99840724 |
| <i>Slc25a36</i>      | 779.03037  | -0.6088301 | 0.30761453 | -1.9791981 | 0.0477937  | 0.99840724 |
| <i>Gm38228</i>       | 112.513279 | -1.3124291 | 0.66332855 | -1.9785506 | 0.04786663 | 0.99840724 |
| <i>Tecta</i>         | 6.73440572 | -4.7891268 | 2.4225142  | -1.9769241 | 0.0480502  | 0.99840724 |
| <i>Zfp597</i>        | 147.023233 | -1.0816389 | 0.54803035 | -1.9736843 | 0.04841765 | 0.99840724 |
| <i>Xkr6</i>          | 15.0734578 | 2.58319894 | 1.30919915 | 1.97311382 | 0.0484826  | 0.99840724 |
| <i>Phf3</i>          | 646.079503 | -0.5954957 | 0.30181475 | -1.9730502 | 0.04848984 | 0.99840724 |
| <i>Trpm4</i>         | 181.864705 | -0.8314135 | 0.4214671  | -1.9726651 | 0.04853373 | 0.99840724 |
| <i>Zfp78</i>         | 60.4723985 | -0.9710055 | 0.49258886 | -1.9712291 | 0.04869767 | 0.99840724 |
| <i>2010007H06Rik</i> | 41.9167909 | -1.6222257 | 0.8244381  | -1.9676744 | 0.04910551 | 0.99840724 |
| <i>4732496C06Rik</i> | 55.7164958 | -1.1515738 | 0.58534528 | -1.9673411 | 0.0491439  | 0.99840724 |
| <i>Ddx19b</i>        | 364.925468 | -0.4996168 | 0.2541129  | -1.9661214 | 0.04928459 | 0.99840724 |
| <i>Usp36</i>         | 558.910318 | -0.3778656 | 0.19221473 | -1.9658514 | 0.04931578 | 0.99840724 |
| <i>Gm17477</i>       | 22.4453728 | -1.5290906 | 0.77801948 | -1.9653628 | 0.04937226 | 0.99840724 |
| <i>Wwox</i>          | 122.438918 | -0.7247985 | 0.36889395 | -1.9647884 | 0.04943873 | 0.99840724 |
| <i>Atm</i>           | 428.245146 | -0.828564  | 0.4224641  | -1.9612648 | 0.04984814 | 0.99840724 |
| <i>Gm38403</i>       | 12.5925973 | -4.4644329 | 2.27714241 | -1.9605418 | 0.0499325  | 0.99840724 |
| <i>Gm29156</i>       | 5.66779756 | -5.2247395 | 2.66515521 | -1.9603885 | 0.0499504  | 0.99840724 |
